# Supplementary material for: Graft Function, Albuminuria, and the Risk of Hemorrhage and Thrombosis After Kidney Transplantation
Source: PubMed Central journal article supplement — Can J Kidney Health Dis. 2020 Oct 8;7:2054358120952198. doi: 10.1177/2054358120952198 (PMC7549159; doi:10.1177/2054358120952198), 2020-10-08
Supplement: RTx_GFR-Prot_Bleed-VTE_-_Appendix_-_20200608.pdf [file RTx_GFR-Prot_Bleed-VTE_-_Appendix_-_20200608.pdf]

## **Supplementary Material**

**Figure S1.** Cohort Creation

**Figure S2.** Study Design

**Table S1.** STROBE Checklist

**Table S2.** Databases and Coding Definitions for Inclusion/Exclusion Criteria, Baseline Characteristics, and Outcome Measurements

**Table S3.** Demographic Characteristics of Recipients at 1-Year Post-transplant by Degree of Albuminuria Based on ACR and PCR only

**Figure S1. Cohort Creation**

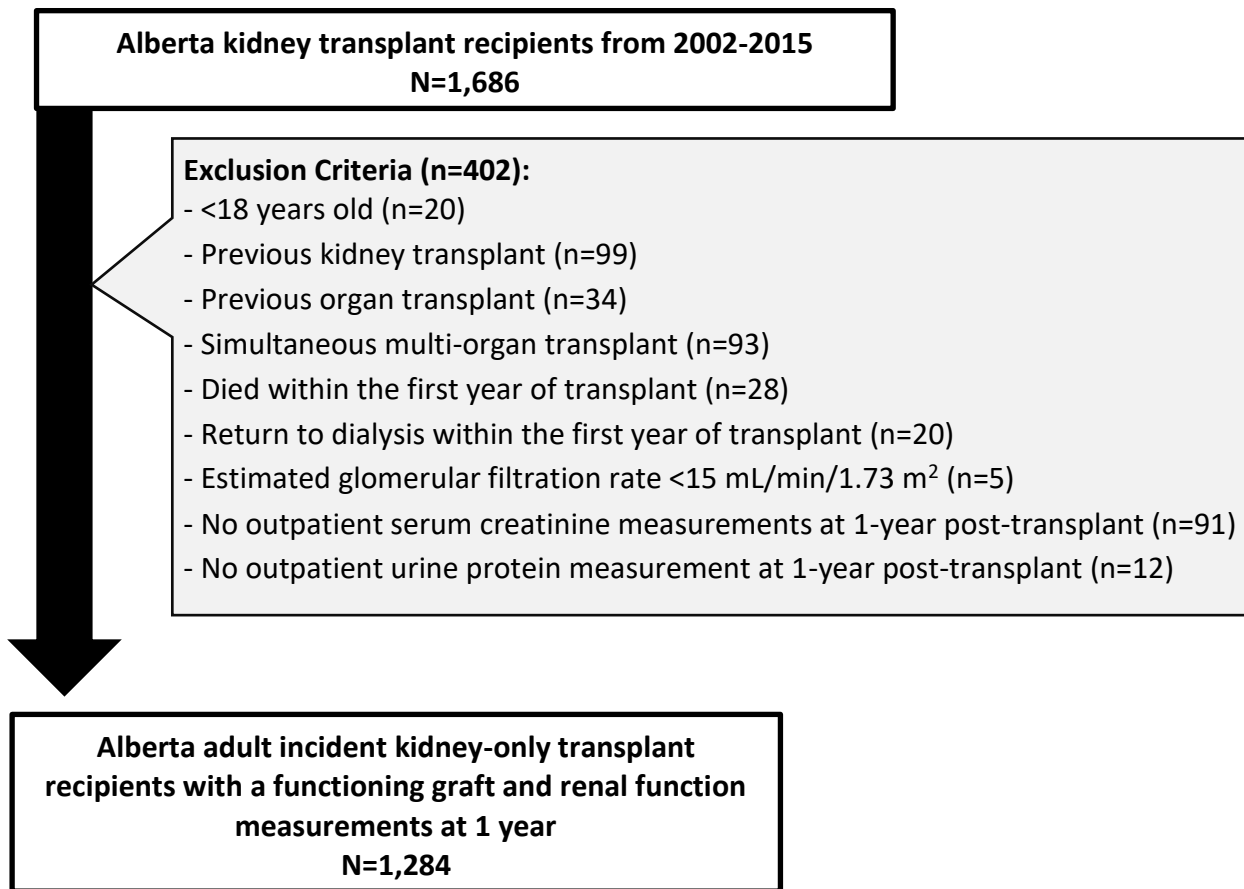

**Figure S2. Study Design**

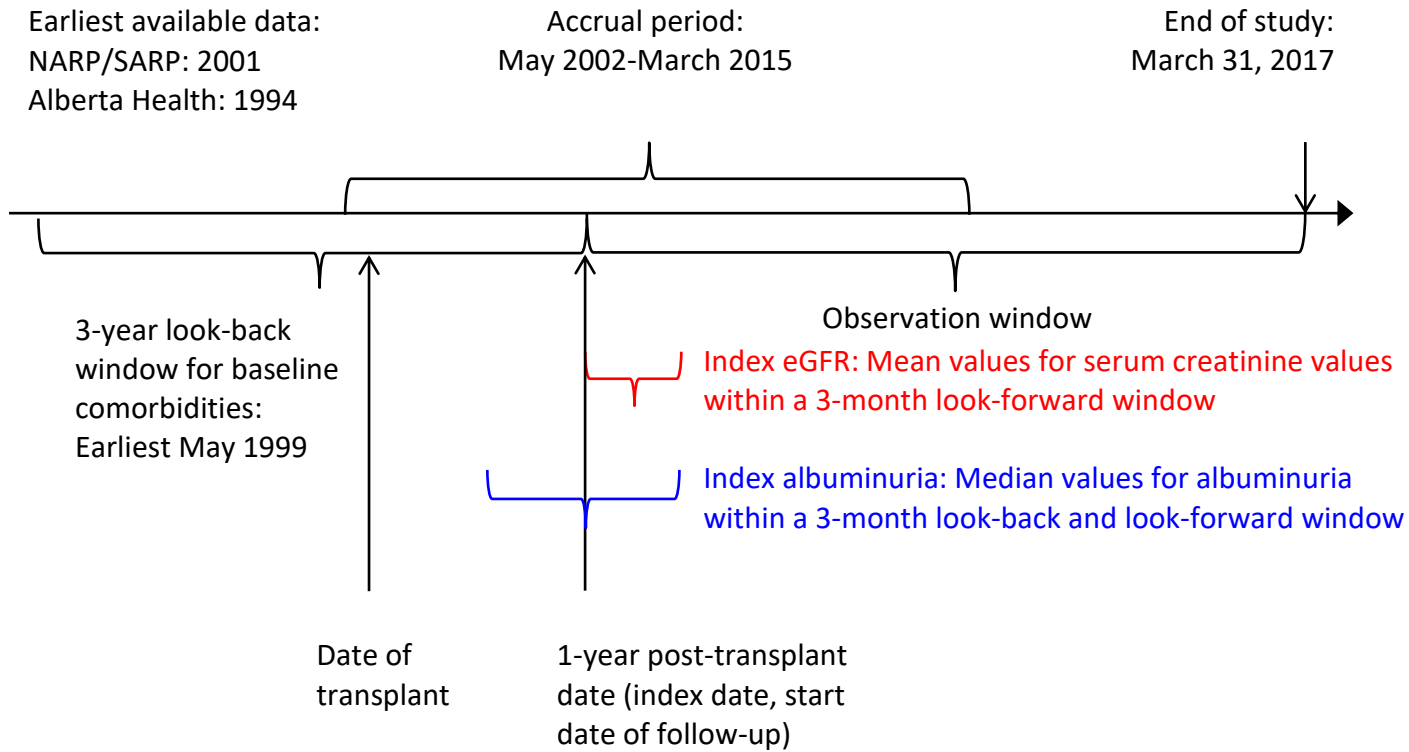

Abbreviations: eGFR, estimated glomerular filtration rate; NARP/SARP, Northern and Southern Alberta Renal Program.

| <b>Table S1. STROBE Checklist <sup>1</sup></b> |             |                                                                                                                                                                                      |                      |
|------------------------------------------------|-------------|--------------------------------------------------------------------------------------------------------------------------------------------------------------------------------------|----------------------|
|                                                | <b>Item</b> | <b>Recommendation</b>                                                                                                                                                                | <b>Section</b>       |
| Title and abstract                             | 1           | (a) Indicate the study's design with a commonly used term in the title or the abstract                                                                                               | Title Page           |
|                                                |             | (b) Provide in the abstract an informative and balanced summary of what was done and what was found                                                                                  | Abstract             |
| <b>Introduction</b>                            |             |                                                                                                                                                                                      |                      |
| Background/rationale                           | 2           | Explain the scientific background and rationale for the investigation being reported                                                                                                 | Introduction         |
| Objectives                                     | 3           | State specific objectives, including any prespecified hypotheses                                                                                                                     | Introduction         |
| <b>Methods</b>                                 |             |                                                                                                                                                                                      |                      |
| Study design                                   | 4           | Present key elements of study design early in the paper                                                                                                                              | Methods              |
| Setting                                        | 5           | Describe the setting, locations, and relevant dates, including periods of recruitment, exposure, follow-up, and data collection                                                      | Methods              |
| Participants                                   | 6           | (a) Give the eligibility criteria, and the sources and methods of selection of participants. Describe methods of follow-up                                                           | Methods              |
|                                                |             | (b) For matched studies, give matching criteria and number of exposed and unexposed                                                                                                  | Not applicable       |
| Variables                                      | 7           | Clearly define all outcomes, exposures, predictors, potential confounders, and effect modifiers. Give diagnostic criteria, if applicable                                             | Methods              |
| Data sources/<br>measurement                   | 8           | For each variable of interest, give sources of data and details of methods of assessment (measurement). Describe comparability of assessment methods if there is more than one group | Methods              |
| Bias                                           | 9           | Describe any efforts to address potential sources of bias                                                                                                                            | Methods              |
| Study size                                     | 10          | Explain how the study size was arrived at                                                                                                                                            | Methods<br>Figure S1 |
| Quantitative variables                         | 11          | Explain how quantitative variables were handled in the analyses. If applicable, describe which groupings were chosen and why                                                         | Methods              |
| Statistical methods                            | 12          | (a) Describe all statistical methods, including those used to control for confounding                                                                                                | Methods              |
|                                                |             | (b) Describe any methods used to examine subgroups and interactions                                                                                                                  | Methods              |
|                                                |             | (c) Explain how missing data were addressed                                                                                                                                          | Methods              |
|                                                |             | (d) If applicable, explain how loss to follow-up was addressed                                                                                                                       | Methods              |
|                                                |             | (e) Describe any sensitivity analyses                                                                                                                                                | Methods              |

| <b>Table S1. STROBE Checklist (continued)</b> |             |                                                                                                                                                                                                               |                                             |
|-----------------------------------------------|-------------|---------------------------------------------------------------------------------------------------------------------------------------------------------------------------------------------------------------|---------------------------------------------|
|                                               | <b>Item</b> | <b>Recommendation</b>                                                                                                                                                                                         | <b>Section</b>                              |
| <b>Results</b>                                |             |                                                                                                                                                                                                               |                                             |
| Participants                                  | 13          | (a) Report numbers of individuals at each stage of study—e.g. numbers potentially eligible, examined for eligibility, confirmed eligible, included in the study, completing follow-up, and analysed           | Methods                                     |
|                                               |             | (b) Give reasons for non-participation at each stage                                                                                                                                                          | Methods                                     |
|                                               |             | (c) Consider use of a flow diagram                                                                                                                                                                            | Figure S1                                   |
| Descriptive data                              | 14          | (a) Give characteristics of study participants (e.g. demographic, clinical, social) and information on exposures and potential confounders                                                                    | Results<br>Table 1                          |
|                                               |             | (b) Indicate number of participants with missing data for each variable of interest                                                                                                                           | Table 1                                     |
|                                               |             | (c) Summarise follow-up time (e.g. average and total amount)                                                                                                                                                  | Results                                     |
| Outcome data                                  | 15          | Report numbers of outcome events or summary measures over time                                                                                                                                                | Results                                     |
| Main results                                  | 16          | (a) Give unadjusted estimates and, if applicable, confounder-adjusted estimates and their precision (e.g. 95% confidence interval). Make clear which confounders were adjusted for and why they were included | Results<br>Figure 1<br>Figure 2<br>Figure 3 |
|                                               |             | (b) Report category boundaries when continuous variables were categorized                                                                                                                                     | Results                                     |
|                                               |             | (c) If relevant, consider translating estimates of relative risk into absolute risk for a meaningful time period                                                                                              | Not applicable                              |
| Other analyses                                | 17          | Report other analyses done—e.g. analyses of subgroups and interactions, and sensitivity analyses                                                                                                              | Results<br>Figure 1<br>Figure 2             |
| <b>Discussion</b>                             |             |                                                                                                                                                                                                               |                                             |
| Key results                                   | 18          | Summarise key results with reference to study objectives                                                                                                                                                      | Discussion                                  |
| Limitations                                   | 19          | Discuss limitations of the study, taking into account sources of potential bias or imprecision. Discuss both direction and magnitude of any potential bias                                                    | Discussion                                  |
| Interpretation                                | 20          | Give a cautious overall interpretation of results considering objectives, limitations, multiplicity of analyses, results from similar studies, and other relevant evidence                                    | Discussion                                  |
| Generalisability                              | 21          | Discuss the generalisability (external validity) of the study results                                                                                                                                         | Discussion                                  |
| <b>Other information</b>                      |             |                                                                                                                                                                                                               |                                             |
| Funding                                       | 22          | Give the source of funding and the role of the funders for the present study and, if applicable, for the original study on which the present article is based                                                 | Disclosures                                 |

| <b>Table S2. Databases and Coding Definitions for Inclusion/Exclusion Criteria, Baseline Characteristics, and Outcome Measurements</b> |                    |                                                                                    |                                                                                              |
|----------------------------------------------------------------------------------------------------------------------------------------|--------------------|------------------------------------------------------------------------------------|----------------------------------------------------------------------------------------------|
| <b>Variable</b>                                                                                                                        | <b>Database</b>    | <b>Codes</b>                                                                       |                                                                                              |
| <b>Inclusion Criteria</b>                                                                                                              |                    |                                                                                    |                                                                                              |
| Kidney transplantation                                                                                                                 | NARP, SARP         |                                                                                    |                                                                                              |
| <b>Exclusion Criteria</b>                                                                                                              |                    |                                                                                    |                                                                                              |
| Age                                                                                                                                    | AH                 | Population Registry                                                                |                                                                                              |
| Kidney transplantation<br>(prior to May 2002)                                                                                          | NARP, SARP         |                                                                                    |                                                                                              |
|                                                                                                                                        | AH<br>(since 1994) | CCI code: 1PC85<br>ICD-9-CM: 5569<br>CCP codes: 67.4, 67.59, 67.5                  |                                                                                              |
| Other organ transplant                                                                                                                 | AH                 | Pancreas transplant                                                                | CCI: 1OJ85<br>ICD-9-CM: 528 (includes 5280, 5281, 5282, 5283, 5284, 5285, 5286)<br>CCP: 64.8 |
|                                                                                                                                        |                    | Liver transplant                                                                   | CCI: 1OA85<br>ICD-9-CM: 505 (includes 5051, 5059)<br>CCP: 62.49, 62.4                        |
|                                                                                                                                        |                    | Bowel transplant                                                                   | CCI: 1NK85, 1NP85<br>ICD-9-CM: 4697<br>CCP: 58.99                                            |
|                                                                                                                                        |                    | Multi-visceral transplant                                                          | CCI: 1HY85, 1OK85<br>ICD-9-CM: 336<br>CCP: 45.6                                              |
|                                                                                                                                        |                    | Lung transplant                                                                    | CCI: 1GR85, 1GT85<br>ICD-9-CM: 335 (includes 3350, 3351, 3352)<br>CCP: 45.5                  |
|                                                                                                                                        |                    | Heart transplant                                                                   | CCI: 1HZ85<br>ICD-9-CM: 375<br>CCP: 49.5                                                     |
| Graft failure (dialysis)                                                                                                               | NARP, SARP         |                                                                                    |                                                                                              |
| Mortality                                                                                                                              | AH                 | Alberta Vital Statistics                                                           |                                                                                              |
| Laboratory investigation                                                                                                               | AKDN               | Serum creatinine<br>Urinalysis, Albumin-creatinine ratio, Protein-creatinine ratio |                                                                                              |

| <b>Table S2. Databases and Coding Definitions for Inclusion/Exclusion Criteria, Baseline Characteristics, and Outcome Measurements (continued)</b> |                 |                                                                                                                                                                                                                                                                                                                                                                                                               |                                                                   |
|----------------------------------------------------------------------------------------------------------------------------------------------------|-----------------|---------------------------------------------------------------------------------------------------------------------------------------------------------------------------------------------------------------------------------------------------------------------------------------------------------------------------------------------------------------------------------------------------------------|-------------------------------------------------------------------|
| <b>Variable</b>                                                                                                                                    | <b>Database</b> | <b>Codes</b>                                                                                                                                                                                                                                                                                                                                                                                                  |                                                                   |
| <b>Baseline Characteristics – Demographics</b>                                                                                                     |                 |                                                                                                                                                                                                                                                                                                                                                                                                               |                                                                   |
| Age, Sex, SES, Rural                                                                                                                               | AH              | Population Registry                                                                                                                                                                                                                                                                                                                                                                                           |                                                                   |
| <b>Baseline Characteristics – Kidney-related Characteristics</b>                                                                                   |                 |                                                                                                                                                                                                                                                                                                                                                                                                               |                                                                   |
| Dialysis modality                                                                                                                                  | NARP, SARP      | Variable: Modality = Hemodialysis, Peritoneal dialysis, Pre-care (Pre-emptive)                                                                                                                                                                                                                                                                                                                                |                                                                   |
|                                                                                                                                                    | AH              | ≥2 outpatient claims 90 days apart:<br>CCP: 13.99A, 13.99B, 13.99C, 13.99D, 13.99O, 13.99OA<br>Hemodialysis: if the last hospitalization or claim before initial renal transplantation<br>CCI: 1PZ21HQBR, 1PZ21HQBS<br>CCP: 51.95 (must be outpatient)<br>Peritoneal dialysis: if the last hospitalization or claim before initial renal transplantation<br>CCI: 1PZ21HPD4<br>CCP: 66.98 (must be outpatient) |                                                                   |
| Dialysis/Transplant duration                                                                                                                       | NARP, SARP      |                                                                                                                                                                                                                                                                                                                                                                                                               |                                                                   |
| Site of transplantation                                                                                                                            | NARP, SARP      |                                                                                                                                                                                                                                                                                                                                                                                                               |                                                                   |
| <b>Baseline Co-morbidities</b>                                                                                                                     | <b>Database</b> | <b>Codes</b>                                                                                                                                                                                                                                                                                                                                                                                                  | <b>Validation</b>                                                 |
| Hypertension <sup>2</sup>                                                                                                                          | AH              | 1 hospitalization or 2 claims in 2 years or less:<br>ICD-9-CM: 401-405<br>ICD-10: I10-I13, I15                                                                                                                                                                                                                                                                                                                | ICD-9-CM: Sn 79%, PPV 95%<br>ICD-10: Sn 68%, PPV 93% <sup>3</sup> |
| Diabetes mellitus <sup>4</sup>                                                                                                                     | AH              | 1 hospitalization or 2 claims in 2 years or less:<br>ICD-9-CM: 250<br>ICD-10: E10-E14                                                                                                                                                                                                                                                                                                                         | ICD-9-CM: Sn 86%, PPV 80%                                         |
| Myocardial infarction <sup>5</sup>                                                                                                                 | AH              | 1 most responsible hospitalization:<br>ICD-9-CM: 410<br>ICD-10: I21, I22                                                                                                                                                                                                                                                                                                                                      | ICD-9-CM: Sn 89%, PPV 89%                                         |
| Percutaneous coronary intervention <sup>6</sup>                                                                                                    | AH              | CCP: 51.59C, 51.59D, 51.59E, 51.59F<br>ICD-9-CM (procedure): 0066, 3601, 3602, 3603, 3605, 3606<br>CCI: 1IJ50, 1IJ54GQ-AZ, 1IJ57GQ                                                                                                                                                                                                                                                                            | CCI: PPV 94-96%                                                   |
| Coronary artery bypass graft surgery <sup>6</sup>                                                                                                  | AH              | CCP: 48.11, 48.12, 48.13, 48.14, 48.15, 48.19<br>ICD-9-CM (procedure): 361, 362<br>CCI: 1IJ76                                                                                                                                                                                                                                                                                                                 | CCI: PPV 97-98%                                                   |

| <b>Table S2. Databases and Coding Definitions for Inclusion/Exclusion Criteria, Baseline Characteristics, and Outcome Measurements (continued)</b> |                 |                                                                                                                                                                                                                             |                                                          |
|----------------------------------------------------------------------------------------------------------------------------------------------------|-----------------|-----------------------------------------------------------------------------------------------------------------------------------------------------------------------------------------------------------------------------|----------------------------------------------------------|
| <b>Baseline Co-morbidities</b>                                                                                                                     | <b>Database</b> | <b>Codes</b>                                                                                                                                                                                                                | <b>Validation</b>                                        |
| Heart failure <sup>3,7</sup>                                                                                                                       | AH              | 1 hospitalization or 2 claims in 2 years or less:<br>ICD-9-CM: 398.91, 402.01, 402.11, 402.91, 404.01, 404.03, 404.11, 404.13, 404.91, 404.93, 425.4-425.9, 428<br>ICD-10: I09.9, I25.5, I42.0, I42.5-I42.9, I43, I50       | ICD-9-CM: Sn 72%, PPV 91%<br><br>ICD-10: Sn 69%, PPV 90% |
| Atrial fibrillation <sup>8</sup>                                                                                                                   | AH              | 1 hospitalization or 2 claims in 2 years or less:<br>ICD-9 CM: 427.3<br>ICD-10: I48.0                                                                                                                                       | ICD-9-CM: Sn 84%, PPV 89%                                |
| Stroke/Transient ischemic attack <sup>9</sup>                                                                                                      | AH              | 1 most responsible or post-admittance hospitalization or 1 claim or 1 most emergency department ACCS:<br>ICD-9-CM: 362.3, 430, 431, 433.x1, 434.x1, 435, 436<br>ICD-10: G45.0-G45.3, G45.8-G45.9, H34.1, I60, I61, I63, I64 | ICD-9-CM: PPV 90%<br>ICD-10: PPV 92%                     |
| Peripheral vascular disease <sup>10</sup>                                                                                                          | AH              | 1 hospitalization or 1 claim or 1 ACCS:<br>ICD-9-CM: 440.2<br>ICD-10: I70.2                                                                                                                                                 | ICD-9-CM: Sn 77%, PPV 94%                                |
| Cancer, lymphoma <sup>3</sup>                                                                                                                      | AH              | 1 hospitalization or 2 claims in 2 years or less:<br>ICD-9-CM: 200-202, 203.0, 238.6<br>ICD-10: C81-C85, C88, C90.0, C90.2, C96                                                                                             | ICD-9-CM: Sn 66%, PPV 73%<br>ICD-10: Sn 63%, PPV 79%     |
| Cancer, solid tumor without metastasis <sup>3</sup>                                                                                                | AH              | 1 hospitalization or 2 claims in 2 years or less:<br>ICD-9-CM: 140-172, 174-195<br>ICD-10: C00-C26, C30-C34, C37-C41, C43, C45-C58, C60-C76, C97                                                                            | ICD-9-CM: Sn 44%, PPV 57%<br>ICD-10: Sn 46%, PPV 59%     |
| Cancer, metastatic <sup>3</sup>                                                                                                                    | AH              | 1 hospitalization or 2 claims in 2 years or less:<br>ICD-9-CM: 196-199<br>ICD-10: C77-C80                                                                                                                                   | ICD-9-CM: Sn 83%, PPV 89%<br>ICD-10: Sn 81%, PPV 87%     |
| Hemorrhage                                                                                                                                         | AH              | See below                                                                                                                                                                                                                   |                                                          |
| Venous thromboembolism                                                                                                                             | AH              | See below                                                                                                                                                                                                                   |                                                          |



| <b>Table S2. Databases and Coding Definitions for Inclusion/Exclusion Criteria, Baseline Characteristics, and Outcome Measurements (continued)</b>                              |                 |                                                                                                                                                                                                                                                                                                                                                                                                                        |                   |
|---------------------------------------------------------------------------------------------------------------------------------------------------------------------------------|-----------------|------------------------------------------------------------------------------------------------------------------------------------------------------------------------------------------------------------------------------------------------------------------------------------------------------------------------------------------------------------------------------------------------------------------------|-------------------|
| <b>Outcomes</b>                                                                                                                                                                 | <b>Database</b> | <b>Codes</b>                                                                                                                                                                                                                                                                                                                                                                                                           | <b>Validation</b> |
| Hemorrhage <sup>11</sup>                                                                                                                                                        | AH              | 1 hospitalization<br>Subarachnoid hemorrhage:<br>ICD-9-CM: 430<br>ICD-10: I60                                                                                                                                                                                                                                                                                                                                          | ICD-9-CM: PPV 94% |
|                                                                                                                                                                                 |                 | Intracerebral hemorrhage:<br>ICD-9-CM: 431<br>ICD-10: I61                                                                                                                                                                                                                                                                                                                                                              |                   |
|                                                                                                                                                                                 |                 | Other non-traumatic intracranial hemorrhage:<br>ICD-9-CM: 432<br>ICD-10: I62                                                                                                                                                                                                                                                                                                                                           |                   |
|                                                                                                                                                                                 |                 | Upper gastrointestinal bleed:<br>ICD-9-CM: 456.0, 456.2, 530.7, 530.8, 531.0, 531.2, 531.4, 531.6, 532.0, 532.2, 532.4, 532.6, 533.0, 533.2, 533.4, 533.6, 534.0, 534.2, 534.4, 534.6, 535.01, 535.11, 535.21, 535.31, 535.41, 535.51, 535.61, 537.8<br>ICD-10: I85.0, I98.3, K22.6, K22.8, K25.0, K25.2, K25.4, K25.6, K26.0, K26.2, K26.4, K26.6, K27.0, K27.2, K27.4, K27.6, K28.0, K28.2, K28.4, K28.6, K29, K31.8 | ICD-9-CM: PPV 90% |
| Lower gastrointestinal bleed (excluding hemorrhoids):<br>ICD-9-CM: 562.02, 562.03, 568.81, 569.3, 569.85, 578<br>ICD-10: K55.2, K57.0, K57.1, K66.1, K62.5, K92.0, K92.1, K92.2 |                 |                                                                                                                                                                                                                                                                                                                                                                                                                        |                   |

| <b>Table S2. Databases and Coding Definitions for Inclusion/Exclusion Criteria, Baseline Characteristics, and Outcome Measurements (continued)</b>                                                                                                                                                                                                                                                                                                                                                                                                                                                                                                                                                  |                 |                                                                                                                                                                                                                                           |                                                   |
|-----------------------------------------------------------------------------------------------------------------------------------------------------------------------------------------------------------------------------------------------------------------------------------------------------------------------------------------------------------------------------------------------------------------------------------------------------------------------------------------------------------------------------------------------------------------------------------------------------------------------------------------------------------------------------------------------------|-----------------|-------------------------------------------------------------------------------------------------------------------------------------------------------------------------------------------------------------------------------------------|---------------------------------------------------|
| <b>Outcomes</b>                                                                                                                                                                                                                                                                                                                                                                                                                                                                                                                                                                                                                                                                                     | <b>Database</b> | <b>Codes</b>                                                                                                                                                                                                                              | <b>Validation</b>                                 |
| Venous thromboembolism <sup>12</sup>                                                                                                                                                                                                                                                                                                                                                                                                                                                                                                                                                                                                                                                                | AH              | 1 diagnostic code for PE or DVT and 1 imaging code in one hospitalization or in 30 days or less for ER/outpatients:<br>Pulmonary embolism:<br>ICD-9-CM: 415.0, 415.1<br>ICD-10: I26.0, I26.9                                              | ICD-9-CM/ICD-10: Sn 75%, Sp 94%, PPV 73%, NPV 94% |
|                                                                                                                                                                                                                                                                                                                                                                                                                                                                                                                                                                                                                                                                                                     |                 | Deep vein thrombosis:<br>ICD-9-CM: 451.1, 451.2, 451.8, 451.9, 453.2, 453.8, 453.9<br>ICD-10: I80.1, I80.2, I80.3, I80.8, I80.9, I82.8, I82.9, O22.3, O22.9, O87.1                                                                        |                                                   |
|                                                                                                                                                                                                                                                                                                                                                                                                                                                                                                                                                                                                                                                                                                     |                 | Imaging:<br>ICD-9-CM (procedure): 88.40, 88.41, 88.43, 88.44, 88.49, 88.77, 88.79, 92.15,<br>CCI: 3GT20, 3GT70, 3KR30, 3IM10, 3IM12, 3JY10, 3JY12, 3JY20, 3KR10, 3KR12, 3KX10, 3KX12, 3KX30<br>CCP: 50.83, 50.84, 50.89, X123, X158, X333 |                                                   |
| Abbreviations: ACCS, Ambulatory Care Classification System; AH, Alberta Health; AKDN, Alberta Kidney Disease Network; CCI, Canadian Classification of Health Interventions; CCP, Canadian Classification of Diagnostic, Therapeutic, and Surgical Procedures; DVT, deep vein thrombosis; ICD-9-CM, International Classification of Diseases, Ninth Revision, Clinical Modification; ICD-10, International Statistical Classification of Diseases, Tenth Revision; NARP, Northern Alberta Renal Program; NPV, negative predictive value; PE, pulmonary embolism; PPV, positive predictive value; SARP, Southern Alberta Renal Program; SES, socio-economic status; Sn, sensitivity; Sp, specificity. |                 |                                                                                                                                                                                                                                           |                                                   |

| <b>Table S3. Demographic Characteristics of Recipients at 1-Year Post-transplant by Degree of Albuminuria Based on ACR and PCR only</b>                                                                                      |                       |                                    |                  |
|------------------------------------------------------------------------------------------------------------------------------------------------------------------------------------------------------------------------------|-----------------------|------------------------------------|------------------|
| <b>Characteristic</b>                                                                                                                                                                                                        | <b>Overall, n (%)</b> | <b>Albuminuria (ACR, PCR only)</b> |                  |
|                                                                                                                                                                                                                              |                       | <b>Absence</b>                     | <b>Presence</b>  |
| <b>Recipients (n)</b>                                                                                                                                                                                                        | 939 (100)             | 479 (51.0)                         | 460 (49.0)       |
| <b>Age (years)</b>                                                                                                                                                                                                           | 54.1 [41.8-62.5]      | 52.2 [40.5-61.7]                   | 55.3 [43.8-63.0] |
| >65 years                                                                                                                                                                                                                    | 178 (19.0)            | 89 (18.6)                          | 89 (19.3)        |
| <b>Female sex</b>                                                                                                                                                                                                            | 319 (34.0)            | 158 (33.0)                         | 161 (35.0)       |
| <b>Socio-economic status<sup>a</sup></b>                                                                                                                                                                                     |                       |                                    |                  |
| Lowest                                                                                                                                                                                                                       | 210 (22.4)            | 99 (20.7)                          | 111 (24.1)       |
| Middle                                                                                                                                                                                                                       | 198 (21.1)            | 104 (21.7)                         | 94 (20.4)        |
| Highest                                                                                                                                                                                                                      | 153 (16.3)            | 84 (17.5)                          | 69 (15.0)        |
| <b>Urban residence<sup>b</sup></b>                                                                                                                                                                                           | 836 (89.0)            | 434 (90.6)                         | 402 (87.4)       |
| <b>Pre-transplant dialysis modality<sup>c</sup></b>                                                                                                                                                                          |                       |                                    |                  |
| Hemodialysis                                                                                                                                                                                                                 | 547 (58.3)            | 273 (57.0)                         | 274 (59.6)       |
| Peritoneal                                                                                                                                                                                                                   | 260 (27.7)            | 137 (28.6)                         | 123 (26.7)       |
| Pre-emptive                                                                                                                                                                                                                  | 132 (14.1)            | 69 (14.4)                          | 63 (13.7)        |
| <b>Dialysis duration (years)</b>                                                                                                                                                                                             | 2.5 [1.4-3.8]         | 2.4 [1.3-3.6]                      | 2.7 [1.6-4.1]    |
| <b>Northern Alberta</b>                                                                                                                                                                                                      | 561 (59.7)            | 295 (61.6)                         | 266 (57.8)       |
| <b>Co-morbidities<sup>d</sup></b>                                                                                                                                                                                            |                       |                                    |                  |
| Hypertension                                                                                                                                                                                                                 | 832 (88.6)            | 420 (87.7)                         | 412 (89.6)       |
| Diabetes mellitus                                                                                                                                                                                                            | 353 (37.6)            | 148 (30.9)                         | 205 (44.6)       |
| Myocardial infarction                                                                                                                                                                                                        | 18 (1.9)              | 7 (1.5)                            | 11 (2.4)         |
| PCI/CABG                                                                                                                                                                                                                     | 37 (3.9)              | 19 (4.0)                           | 18 (3.9)         |
| Heart failure                                                                                                                                                                                                                | 106 (11.3)            | 49 (10.2)                          | 57 (12.4)        |
| Atrial fibrillation                                                                                                                                                                                                          | 49 (5.2)              | 22 (4.6)                           | 27 (5.9)         |
| Stroke/Transient ischemic attack                                                                                                                                                                                             | 41 (4.4)              | 22 (4.6)                           | 19 (4.1)         |
| Peripheral vascular disease                                                                                                                                                                                                  | 82 (8.7)              | 35 (7.3)                           | 47 (10.2)        |
| Cancer                                                                                                                                                                                                                       | 21 (2.2)              | 12 (2.5)                           | 9 (2.0)          |
| Hemorrhage                                                                                                                                                                                                                   | 65 (6.9)              | 35 (7.3)                           | 30 (6.5)         |
| VTE                                                                                                                                                                                                                          | 50 (5.3)              | 21 (4.4)                           | 29 (6.3)         |
| Data is presented as number (%) except for age and dialysis duration, which are presented as median [interquartile range].                                                                                                   |                       |                                    |                  |
| <sup>a</sup> Income was categorized according to fifths of average neighborhood income (first quintile is the lowest and the fifth quintile is the highest).                                                                 |                       |                                    |                  |
| <sup>b</sup> Urban location indicates a population >10,000 or a population >1,000 with population density >400/km <sup>2</sup> .                                                                                             |                       |                                    |                  |
| <sup>c</sup> Recipients identified as pre-emptive were assessed for the presence of dialysis codes and re-classified as hemodialysis (n=10) or peritoneal dialysis (n=7).                                                    |                       |                                    |                  |
| <sup>d</sup> Assessed by the presence of a diagnostic or procedural code in the 3 years prior to the index date except for hypertension and diabetes which are defined by a previously validated algorithm. <sup>29,30</sup> |                       |                                    |                  |
| Abbreviations: ACR, albumin-creatinine ratio; CABG, coronary artery bypass graft; PCI, percutaneous coronary intervention; PCR, protein-creatinine ratio; VTE, venous thromboembolism.                                       |                       |                                    |                  |

## References

1. von Elm E, Altman DG, Egger M, et al. The Strengthening the Reporting of Observational Studies in Epidemiology (STROBE) statement: guidelines for reporting observational studies. *J Clin Epidemiol* 2008; 61: 344–349.
2. Quan H, Khan N, Hemmelgarn BR, et al. Validation of a case definition to define hypertension using administrative data. *Hypertension* 2009; 54: 1423–1428.
3. Quan H, Li B, Duncan Saunders L, et al. Assessing validity of ICD-9-CM and ICD-10 administrative data in recording clinical conditions in a unique dually coded database. *Health Serv Res* 2008; 43: 1424–1441.
4. Hux JE, Ivis F, Flintoft V, et al. Diabetes in Ontario: Determination of prevalence and incidence using a validated administrative data algorithm. *Diabetes Care* 2002; 25: 512–516.
5. Austin PC, Daly PA, Tu J V. A multicenter study of the coding accuracy of hospital discharge administrative data for patients admitted to cardiac care units in Ontario. *Am Heart J* 2002; 144: 290–296.
6. Lee DS, Stitt A, Wang X, et al. Administrative Hospitalization Database Validation of Cardiac Procedure Codes. *Med Care* 2013; 51: e22–e26.
7. Quan H, Sundararajan V, Halfon P, et al. Coding Algorithms for Defining Comorbidities in ICD-9-CM and ICD-10 Administrative Data. *Med Care* 2005; 43: 1130–1139.
8. Alonso A, Agarwal SK, Soliman EZ, et al. Incidence of atrial fibrillation in whites and African-Americans: The Atherosclerosis Risk in Communities (ARIC) study. *Am Heart J* 2009; 158: 111–117.
9. Kokotailo RA, Hill MD. Coding of stroke and stroke risk factors using International Classification of Diseases, revisions 9 and 10. *Stroke* 2005; 36: 1776–1781.
10. Fan J, Arruda-Olson AM, Leibson CL, et al. Billing code algorithms to identify cases of peripheral artery disease from administrative data. *J Am Med Informatics Assoc* 2013; 20: e349–e354.
11. Arnason T, Wells PS, van Walraven C, et al. Accuracy of coding for possible warfarin complications in hospital discharge abstracts. *Thromb Res* 2006; 118: 253–62.
12. Alotaibi GS, Wu C, Senthilselvan A, et al. The validity of ICD codes coupled with imaging procedure codes for identifying acute venous thromboembolism using administrative data. *Vasc Med* 2015; 20: 364–368.
